# Supplementary material
Source: ML conference proceedings conference paper supplement (https://proceedings.mlr.press/v139/yu21e.html)
Supplement: Supplementary file [file yu21e-supp.pdf]

---

# Learning Generalized Intersection Over Union for Dense Pixelwise Prediction

## Supplementary Material

---

Jiaqian Yu<sup>1</sup> Jingtao Xu<sup>1</sup> Yiwei Chen<sup>1</sup> Weiming Li<sup>1</sup> Qiang Wang<sup>1</sup> Byung In Yoo<sup>2</sup> Jae-Joon Han<sup>2</sup>

### A. Pseudo code of PixIoU

Explicitly, we provide the pseudo code for computing PixIoU and Lovász PixIoU as following.

---

**Algorithm 1** Pseudo code on the computation of PixIoU

---

**input**  $\tilde{y}$  the groundtruth,  $y$  the prediction,  $C$  the set of labels.

```
1: for  $c \in C$  do
2:    $m = |\tilde{y} == c|$ ;
3:    $n = (\tilde{y} == c) \ \&\ (y! = c)$ ;
4:    $p = (\tilde{y}! = c) \ \&\ (y == c)$ ;
5:    $iou_c = \frac{m - sum(n)}{m + sum(p)}$ 
6:    $d_n = distanceFunction(y, c)$ 
7:    $d_p = distanceFunction(\tilde{y}, c)$ 
8:    $pixiou_c = \frac{m - \langle d_n, n \rangle}{m + \langle d_p, p \rangle} + iou_c - 1$ 
9: end for
10: return  $pixiou = \frac{1}{|C|} \sum_{c \in C} pixiou_c$ 
```

---

### B. Qualitative results

In this section, we show more qualitative results of the experiments in Figure 1, Figure 2 and Figure 3

---

<sup>1</sup>Samsung Research China - Beijing, Beijing, China <sup>2</sup>Samsung Advanced Institute of Technology, Suwon, South Korea. Correspondence to: Jiaqian Yu <jiaqian.yu@samsung.com>, Qiang Wang <qiang.w@samsung.com>.

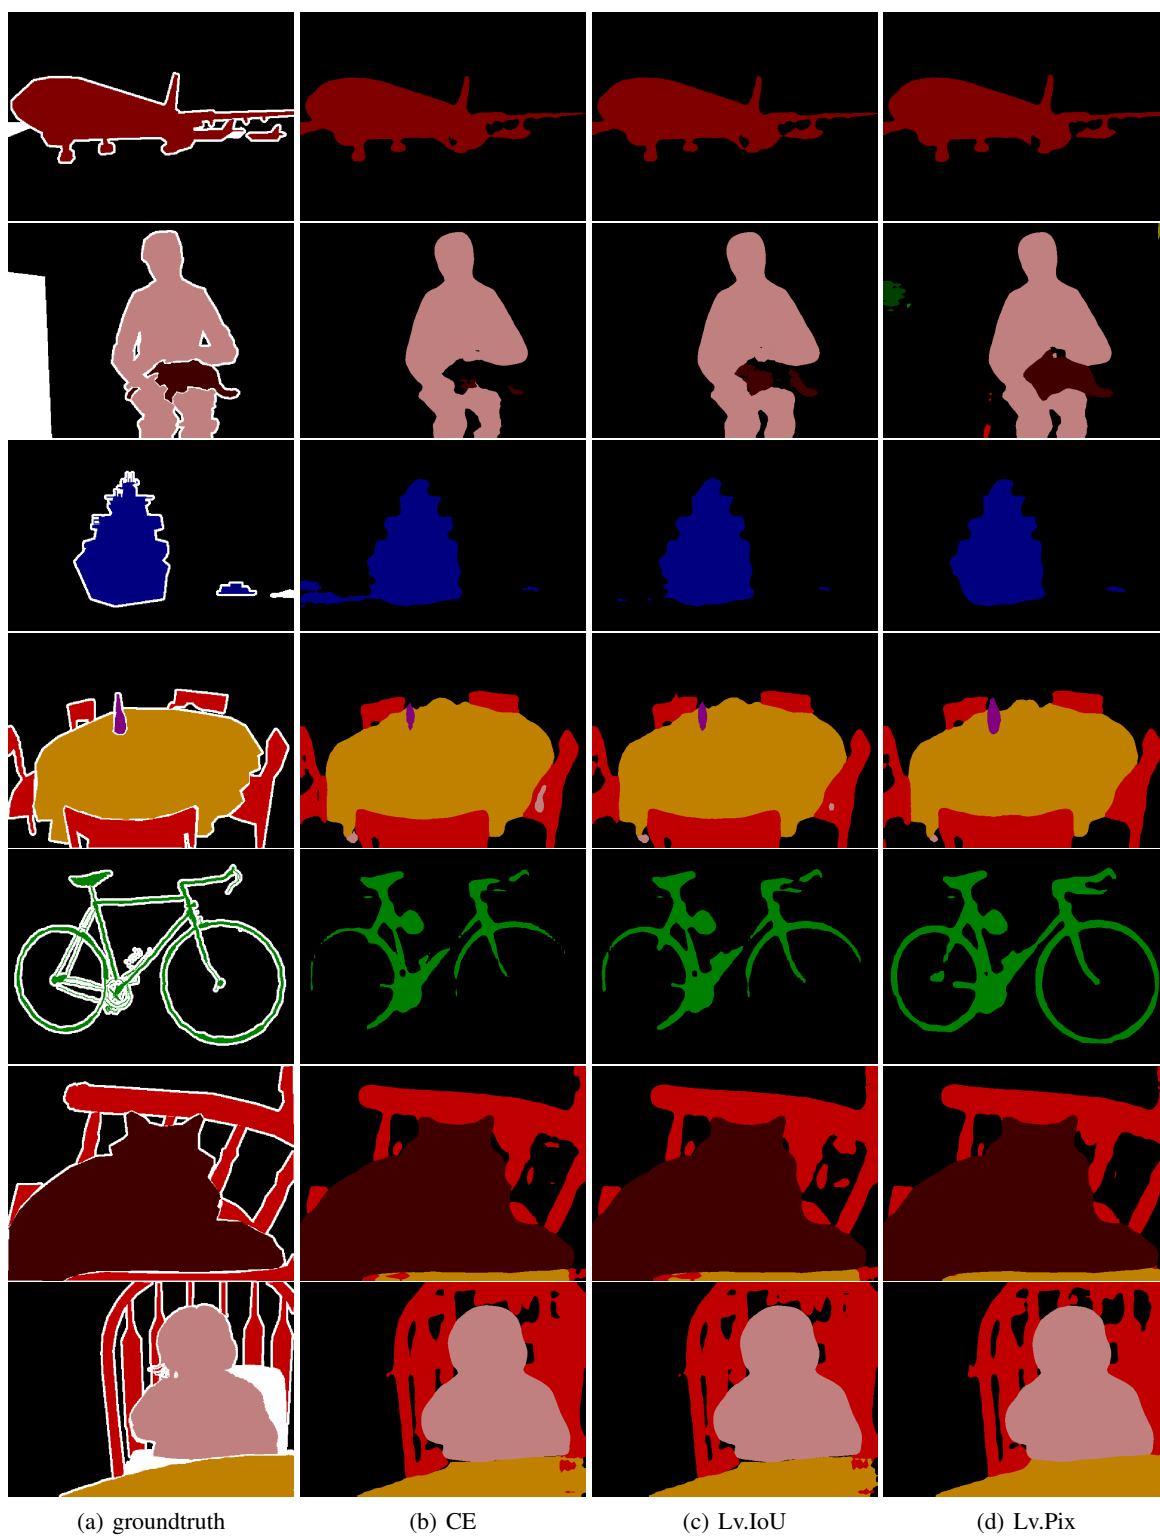

Figure 1: Qualitative results on Pascal VOC 2012 of the model Deeplabv3-resnet101.

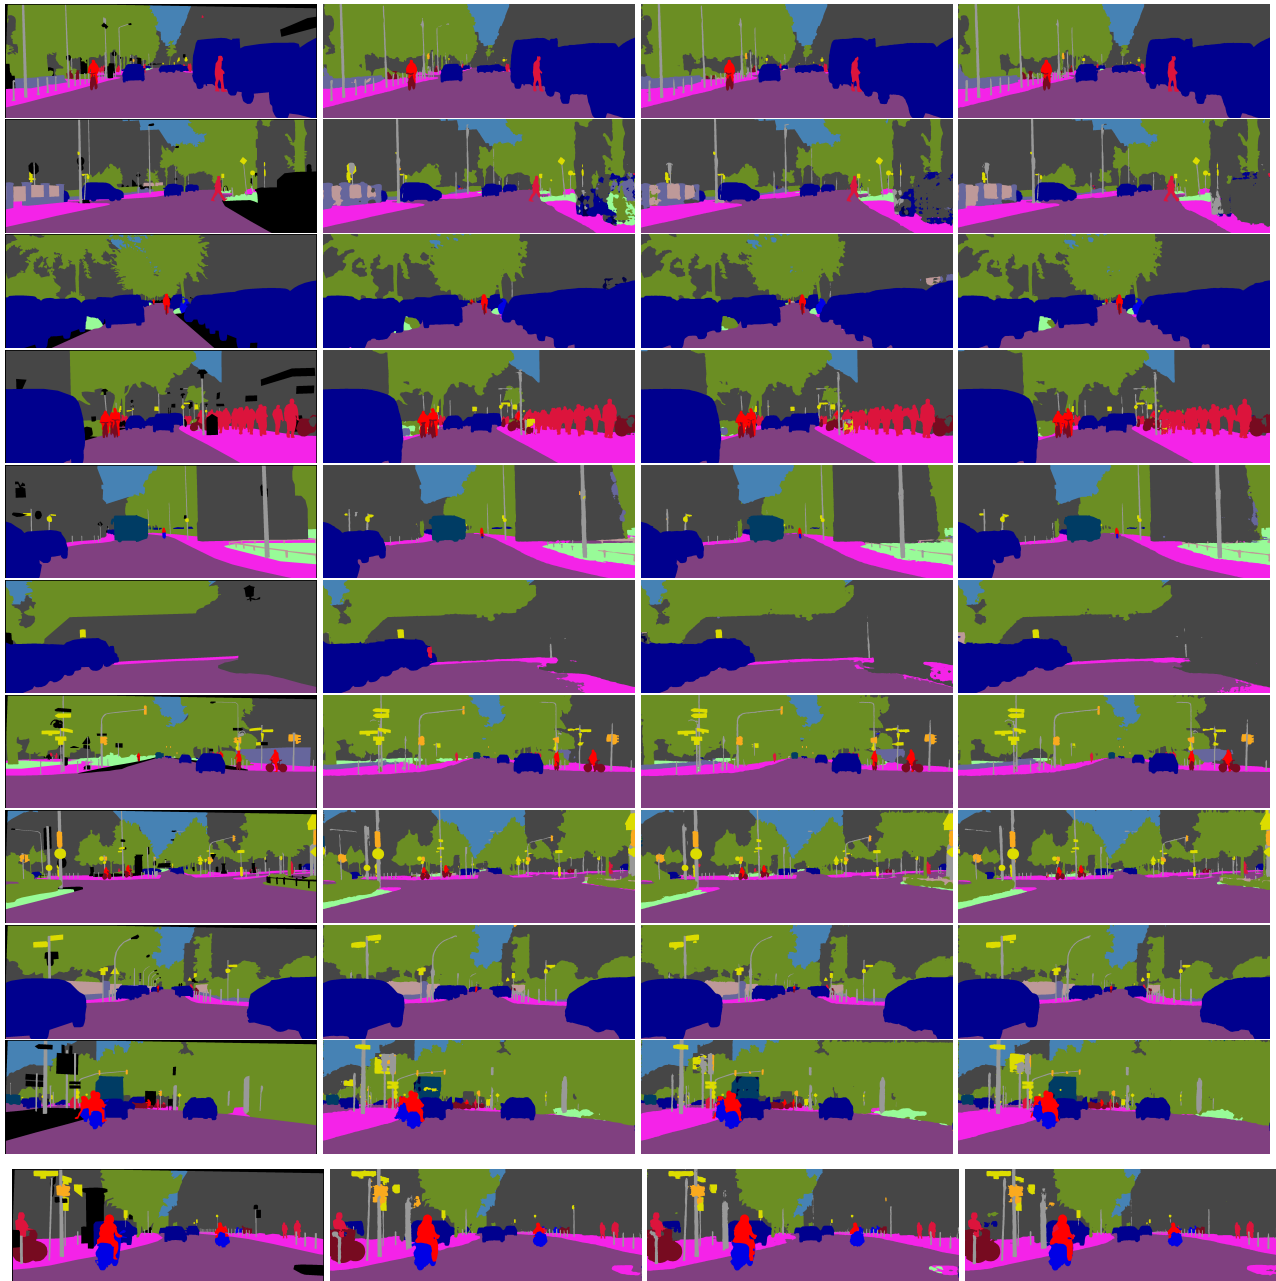

(a) groundtruth

(b) WCE

(c) Lv.IoU

(d) Lv.PixIoU

Figure 2: Qualitative results on Cityscapes of the Deeplabv3+ models trained with different loss functions.

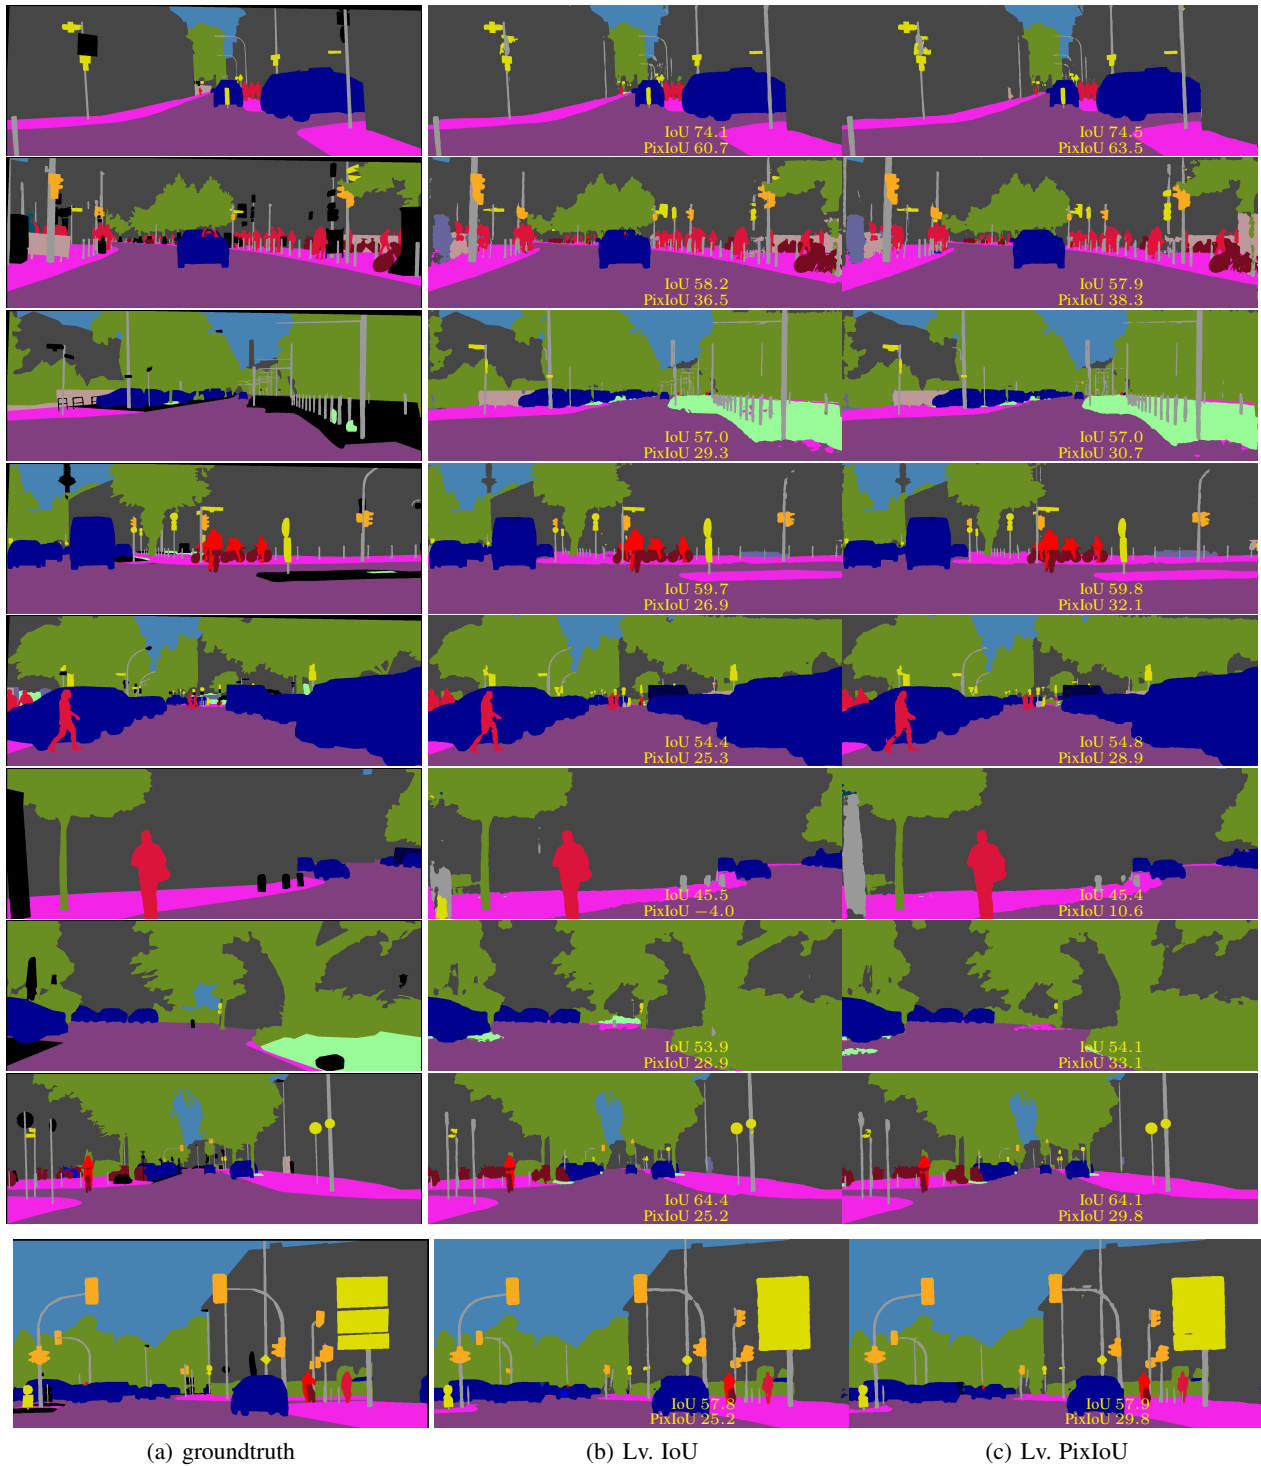

Figure 3: Examples of the cases that PixIoU provides larger gradients than those of IoU, and the predictions with larger PixIoU provides better qualitative results.
